# Supplementary material
Source: PubMed Central journal article supplement (PMC5181112)
Supplement: NIHMS795792-supplement.pdf [file NIHMS795792-supplement.pdf]

Figure S1. Related to Figure 1.

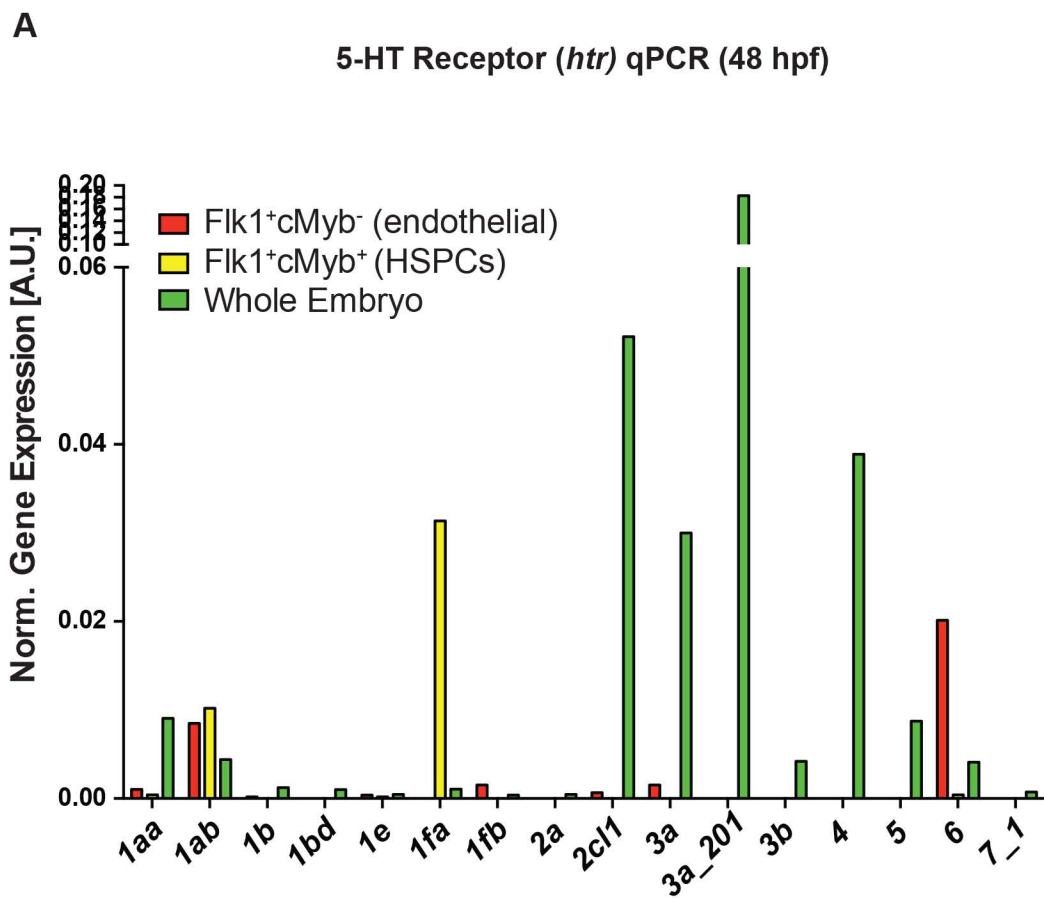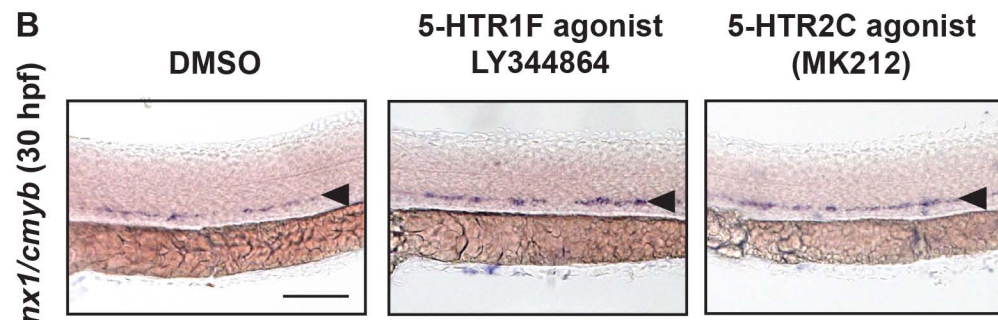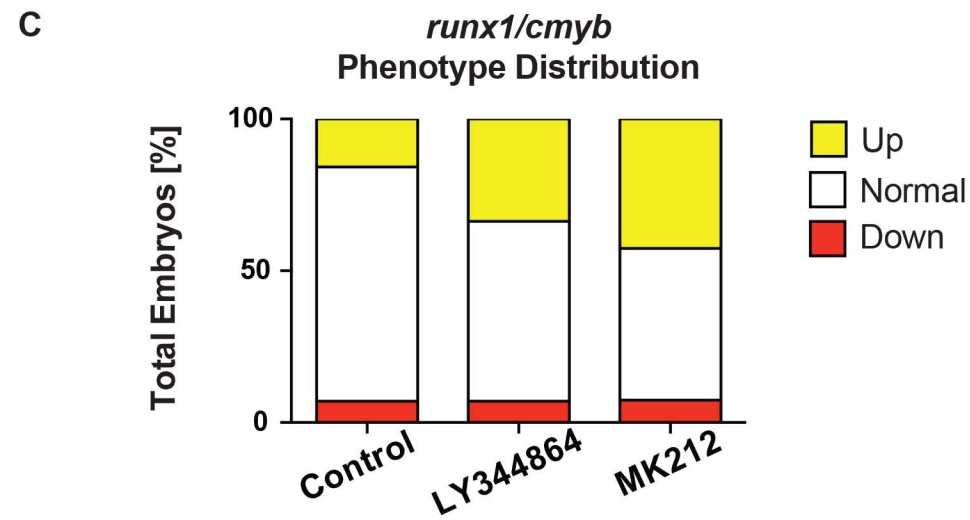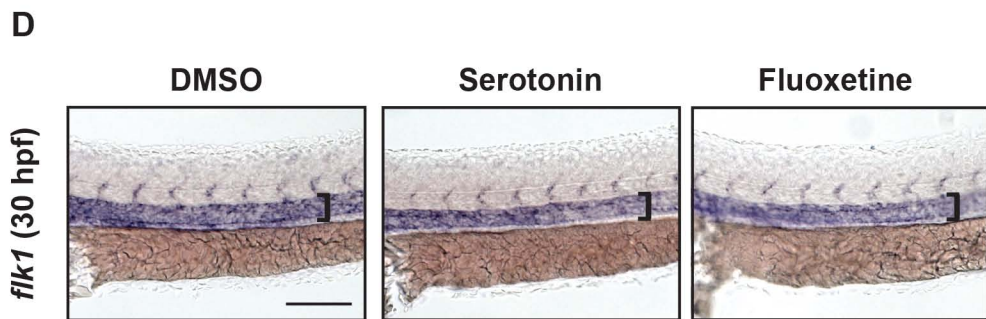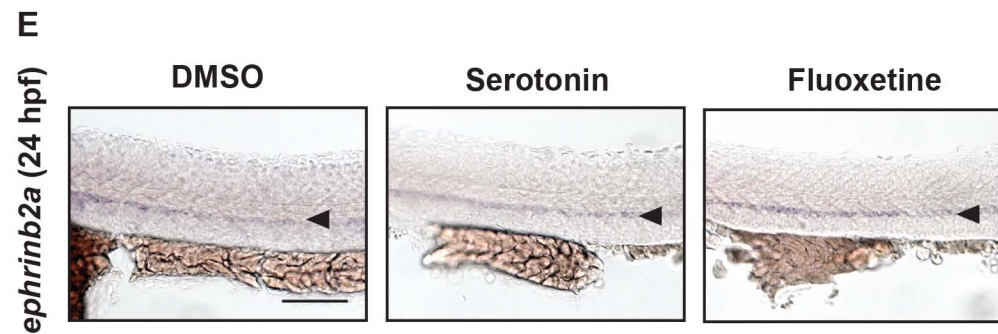

Figure S2. Related to Figure 2.

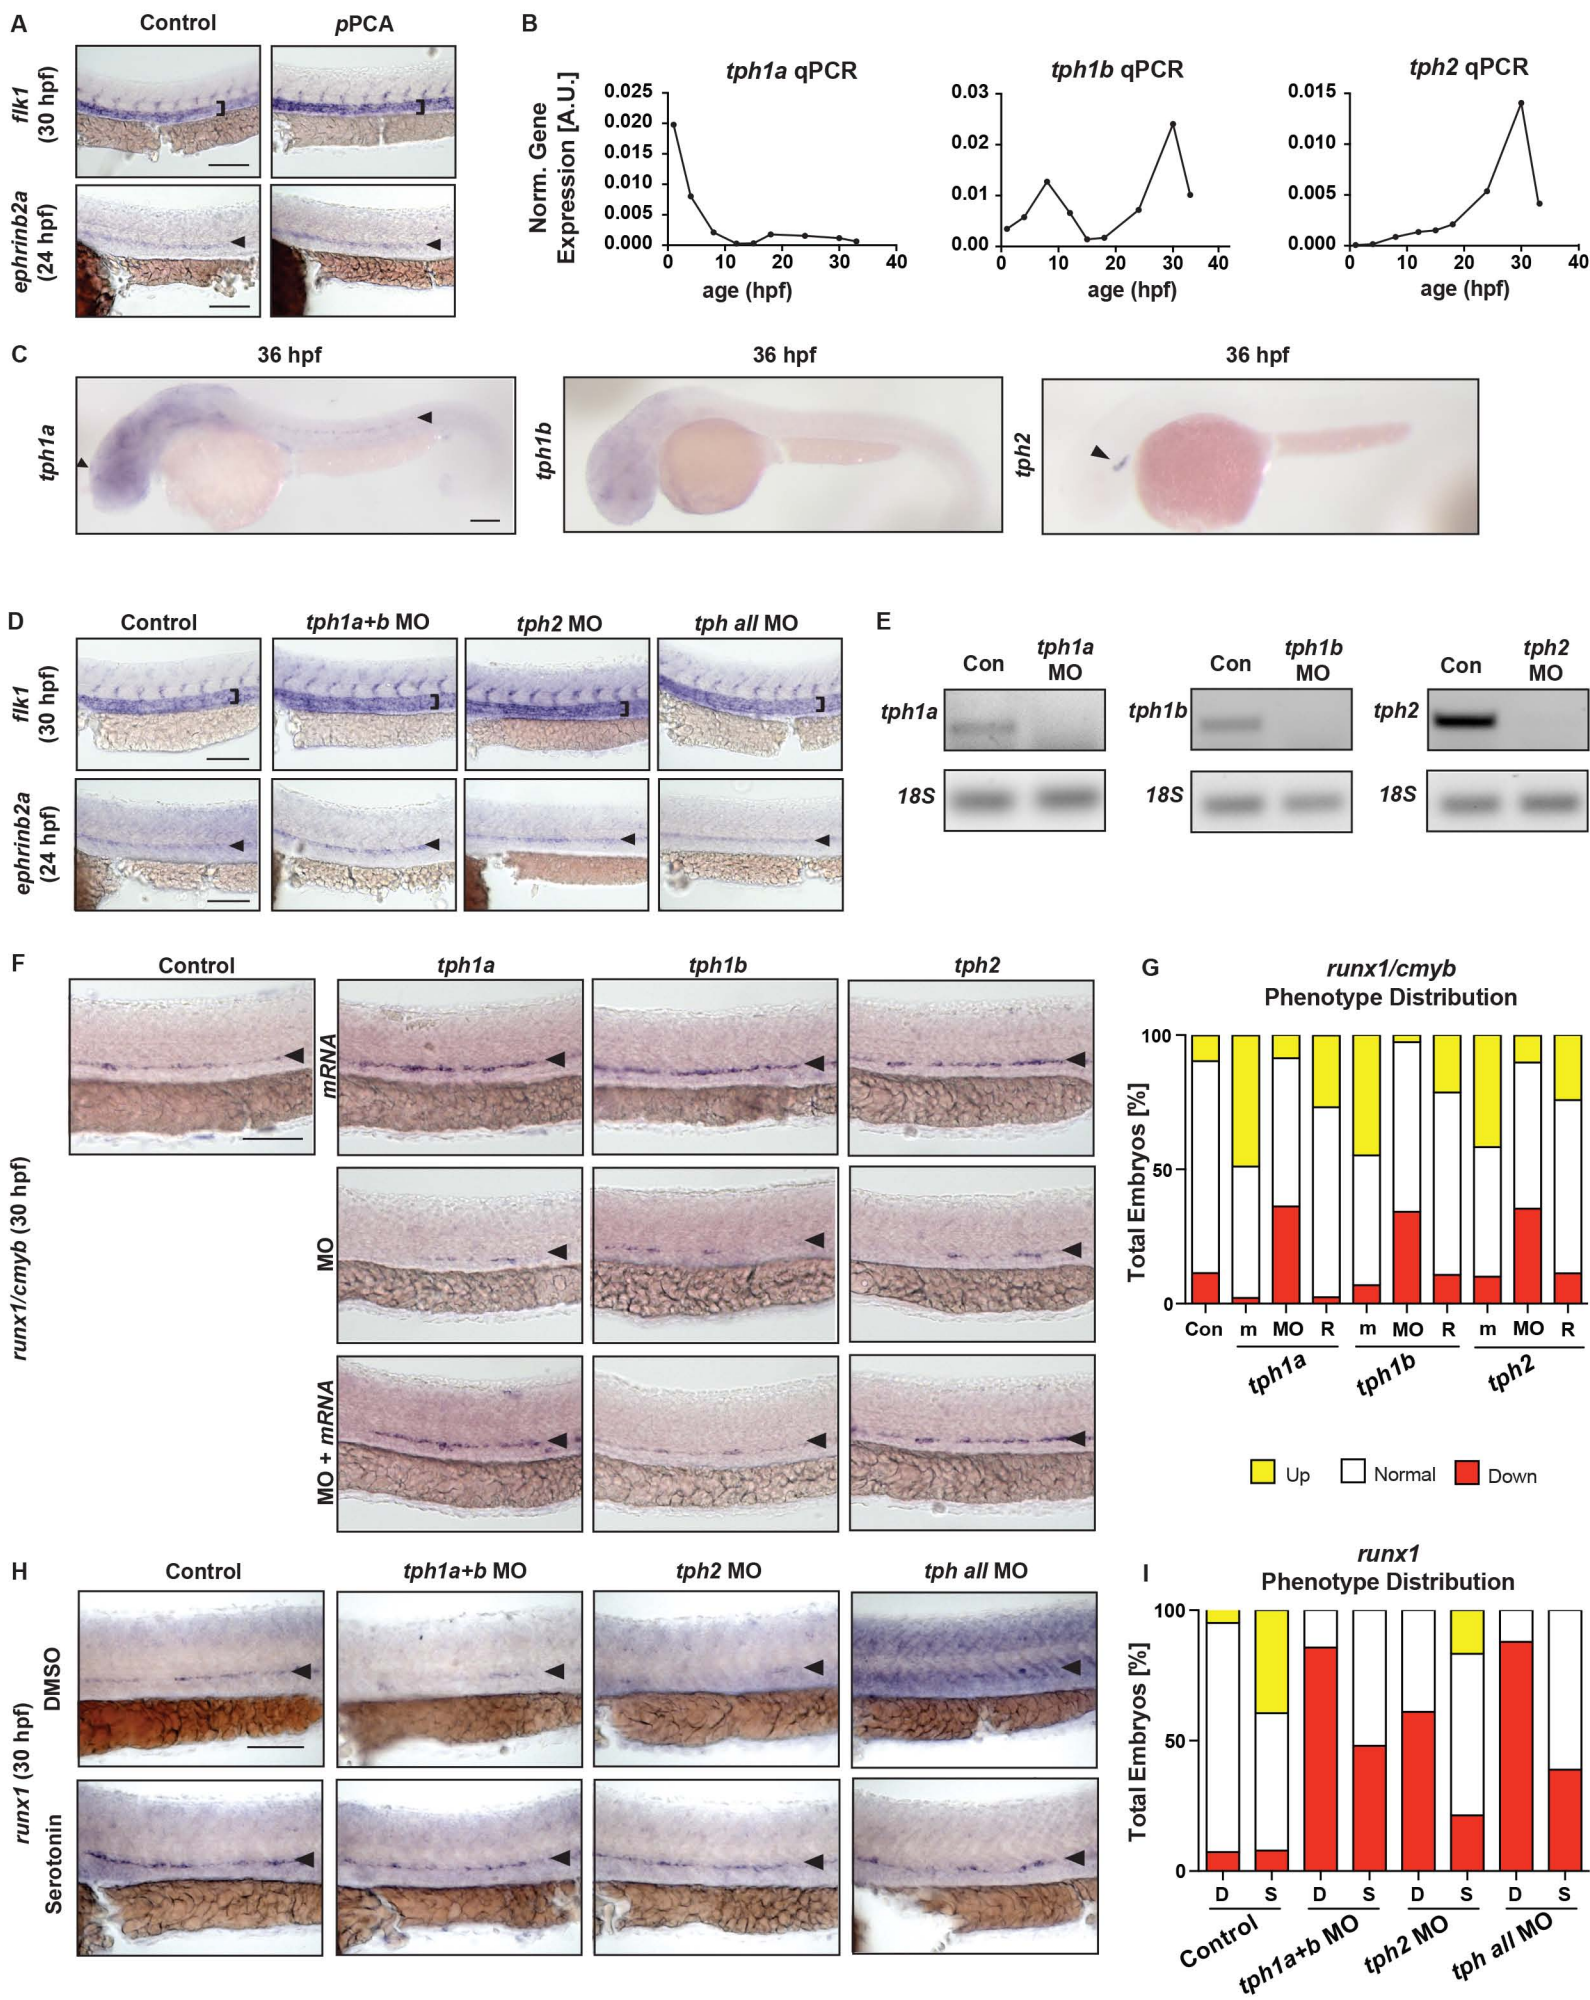

**Figure S3. Related to Figure 2.**

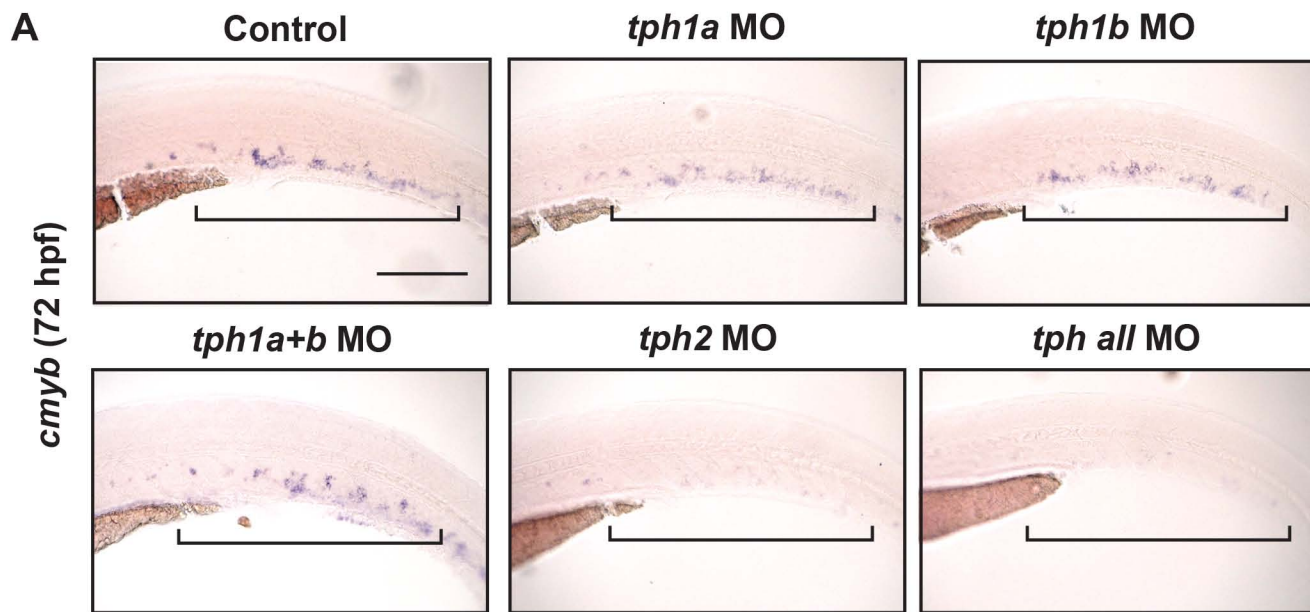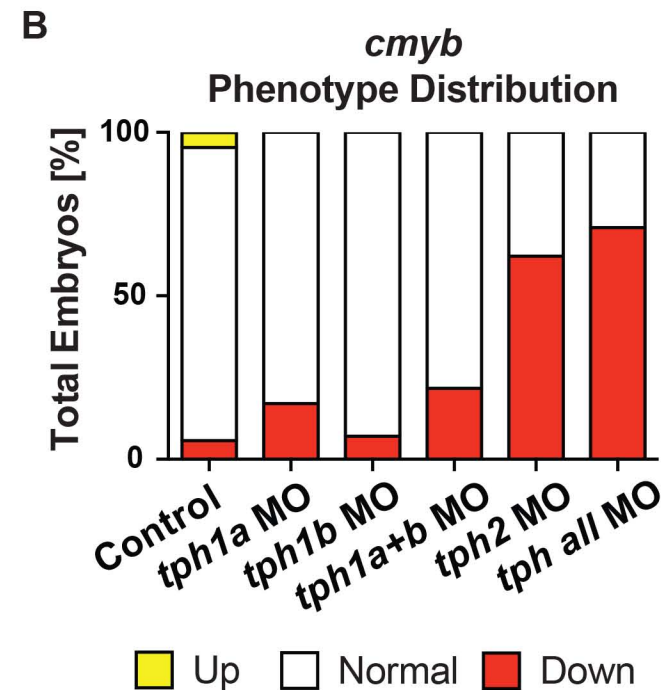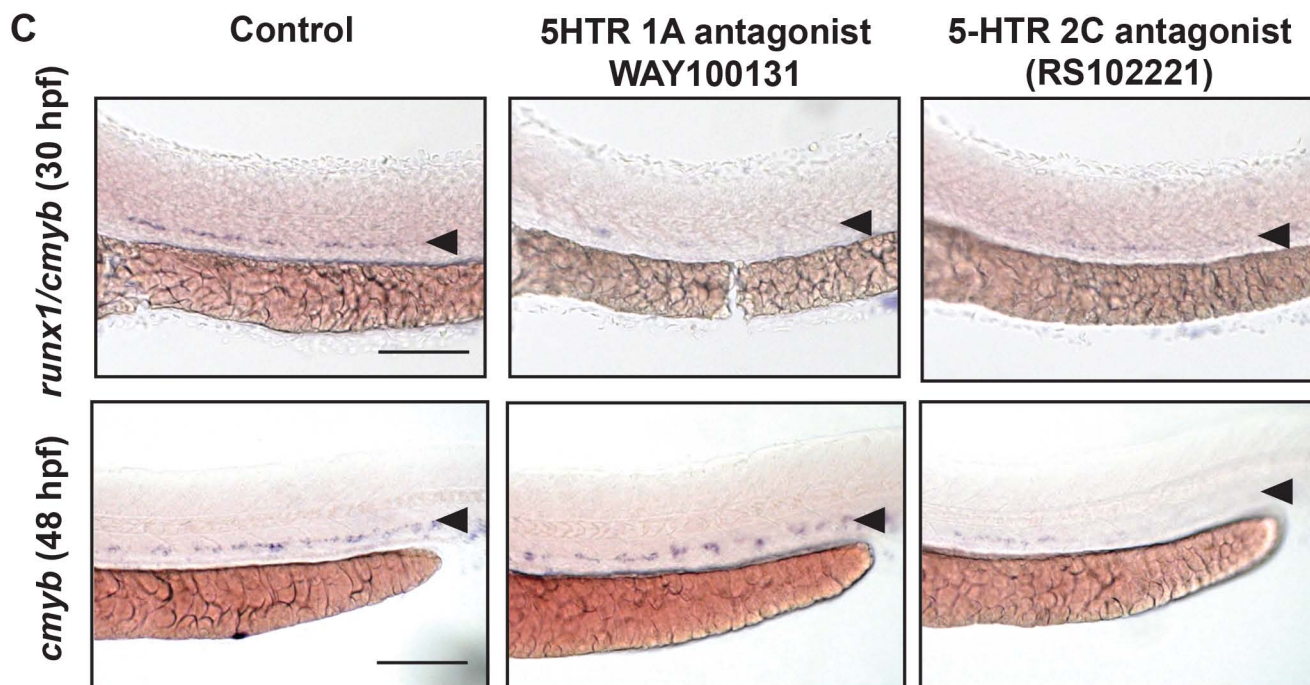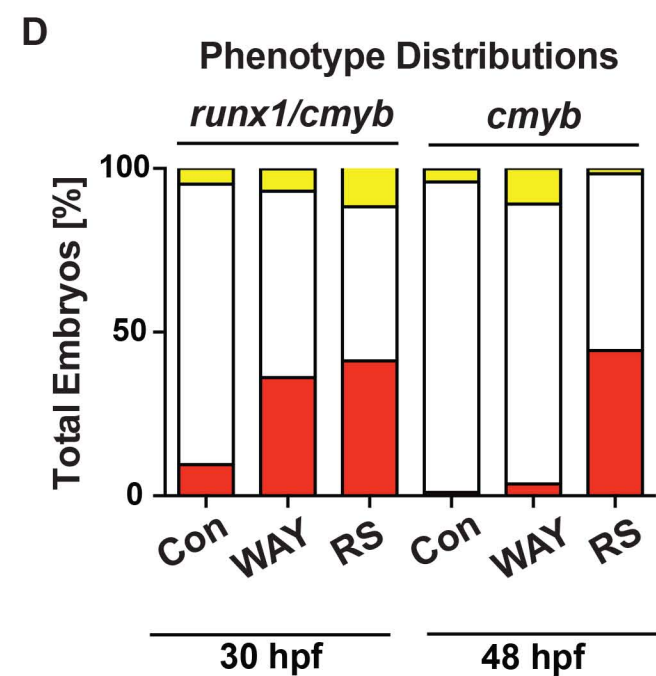

Figure S4. Related to Figure 3.

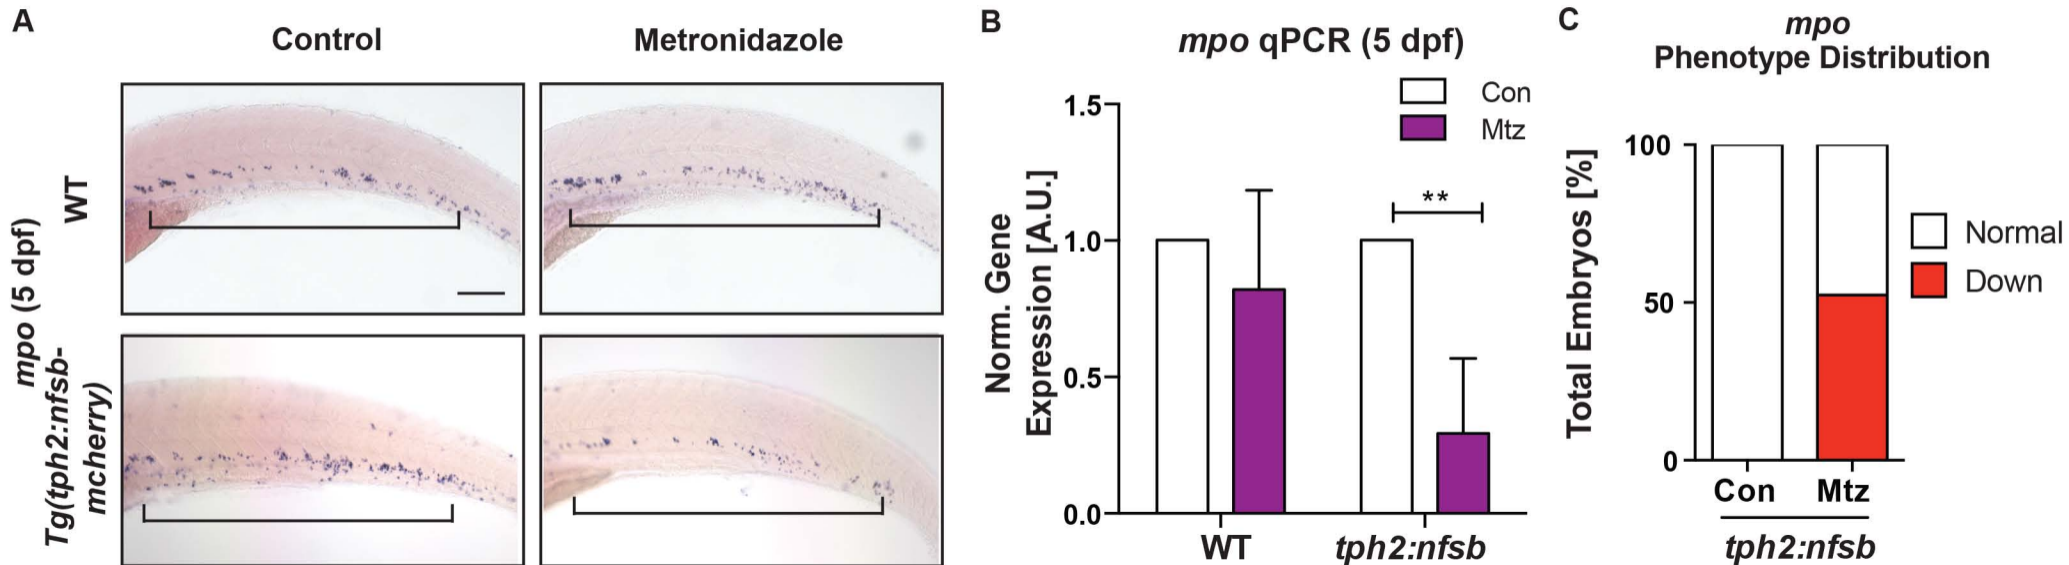

**Figure S5. Related to Figure 4.**

**A**

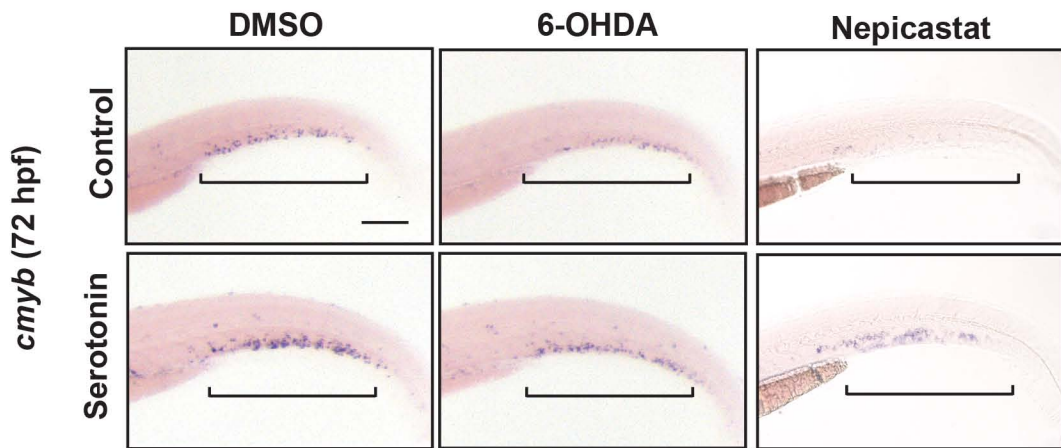

**B**

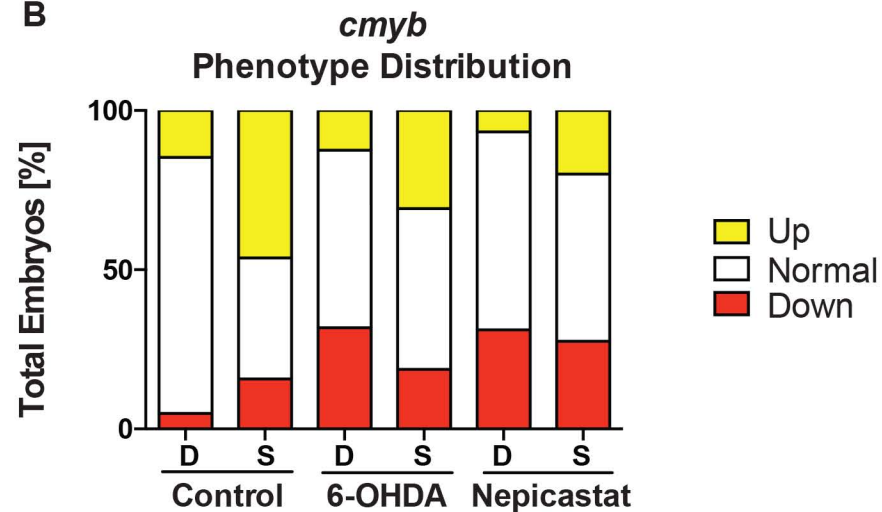

**C**

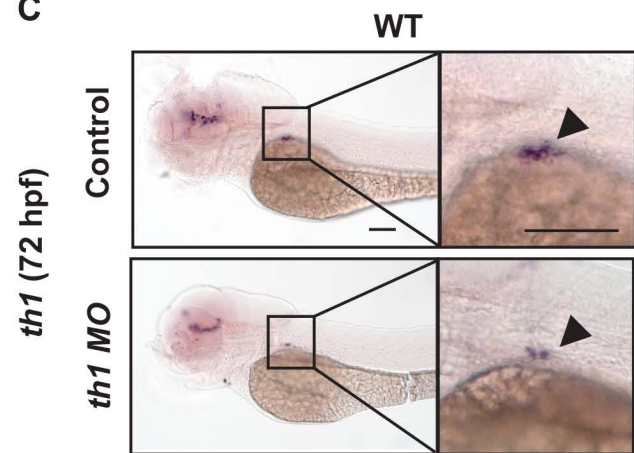

**D**

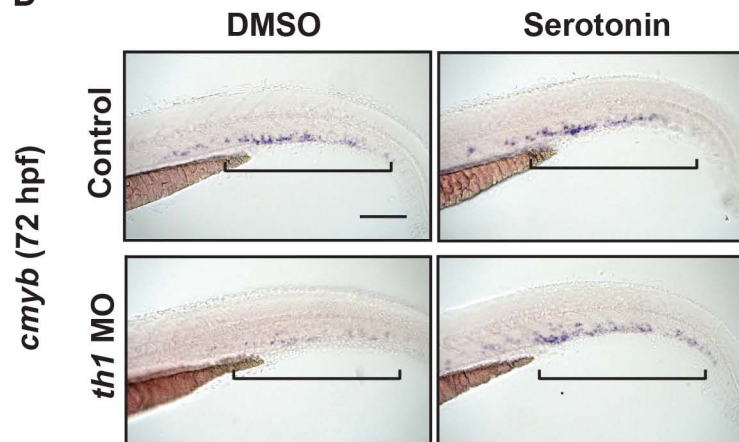

**E**

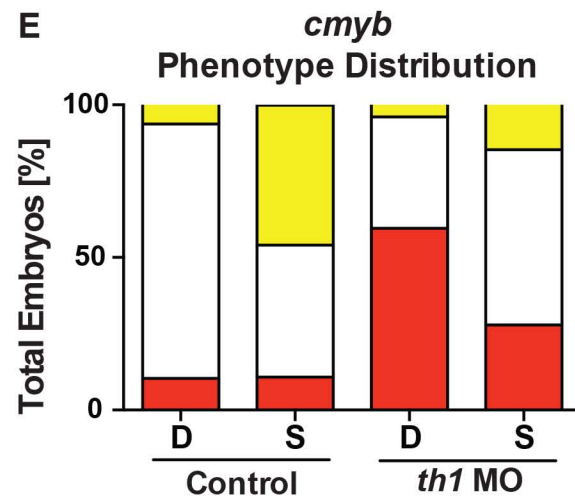

Figure S6. Related to Figure 5.

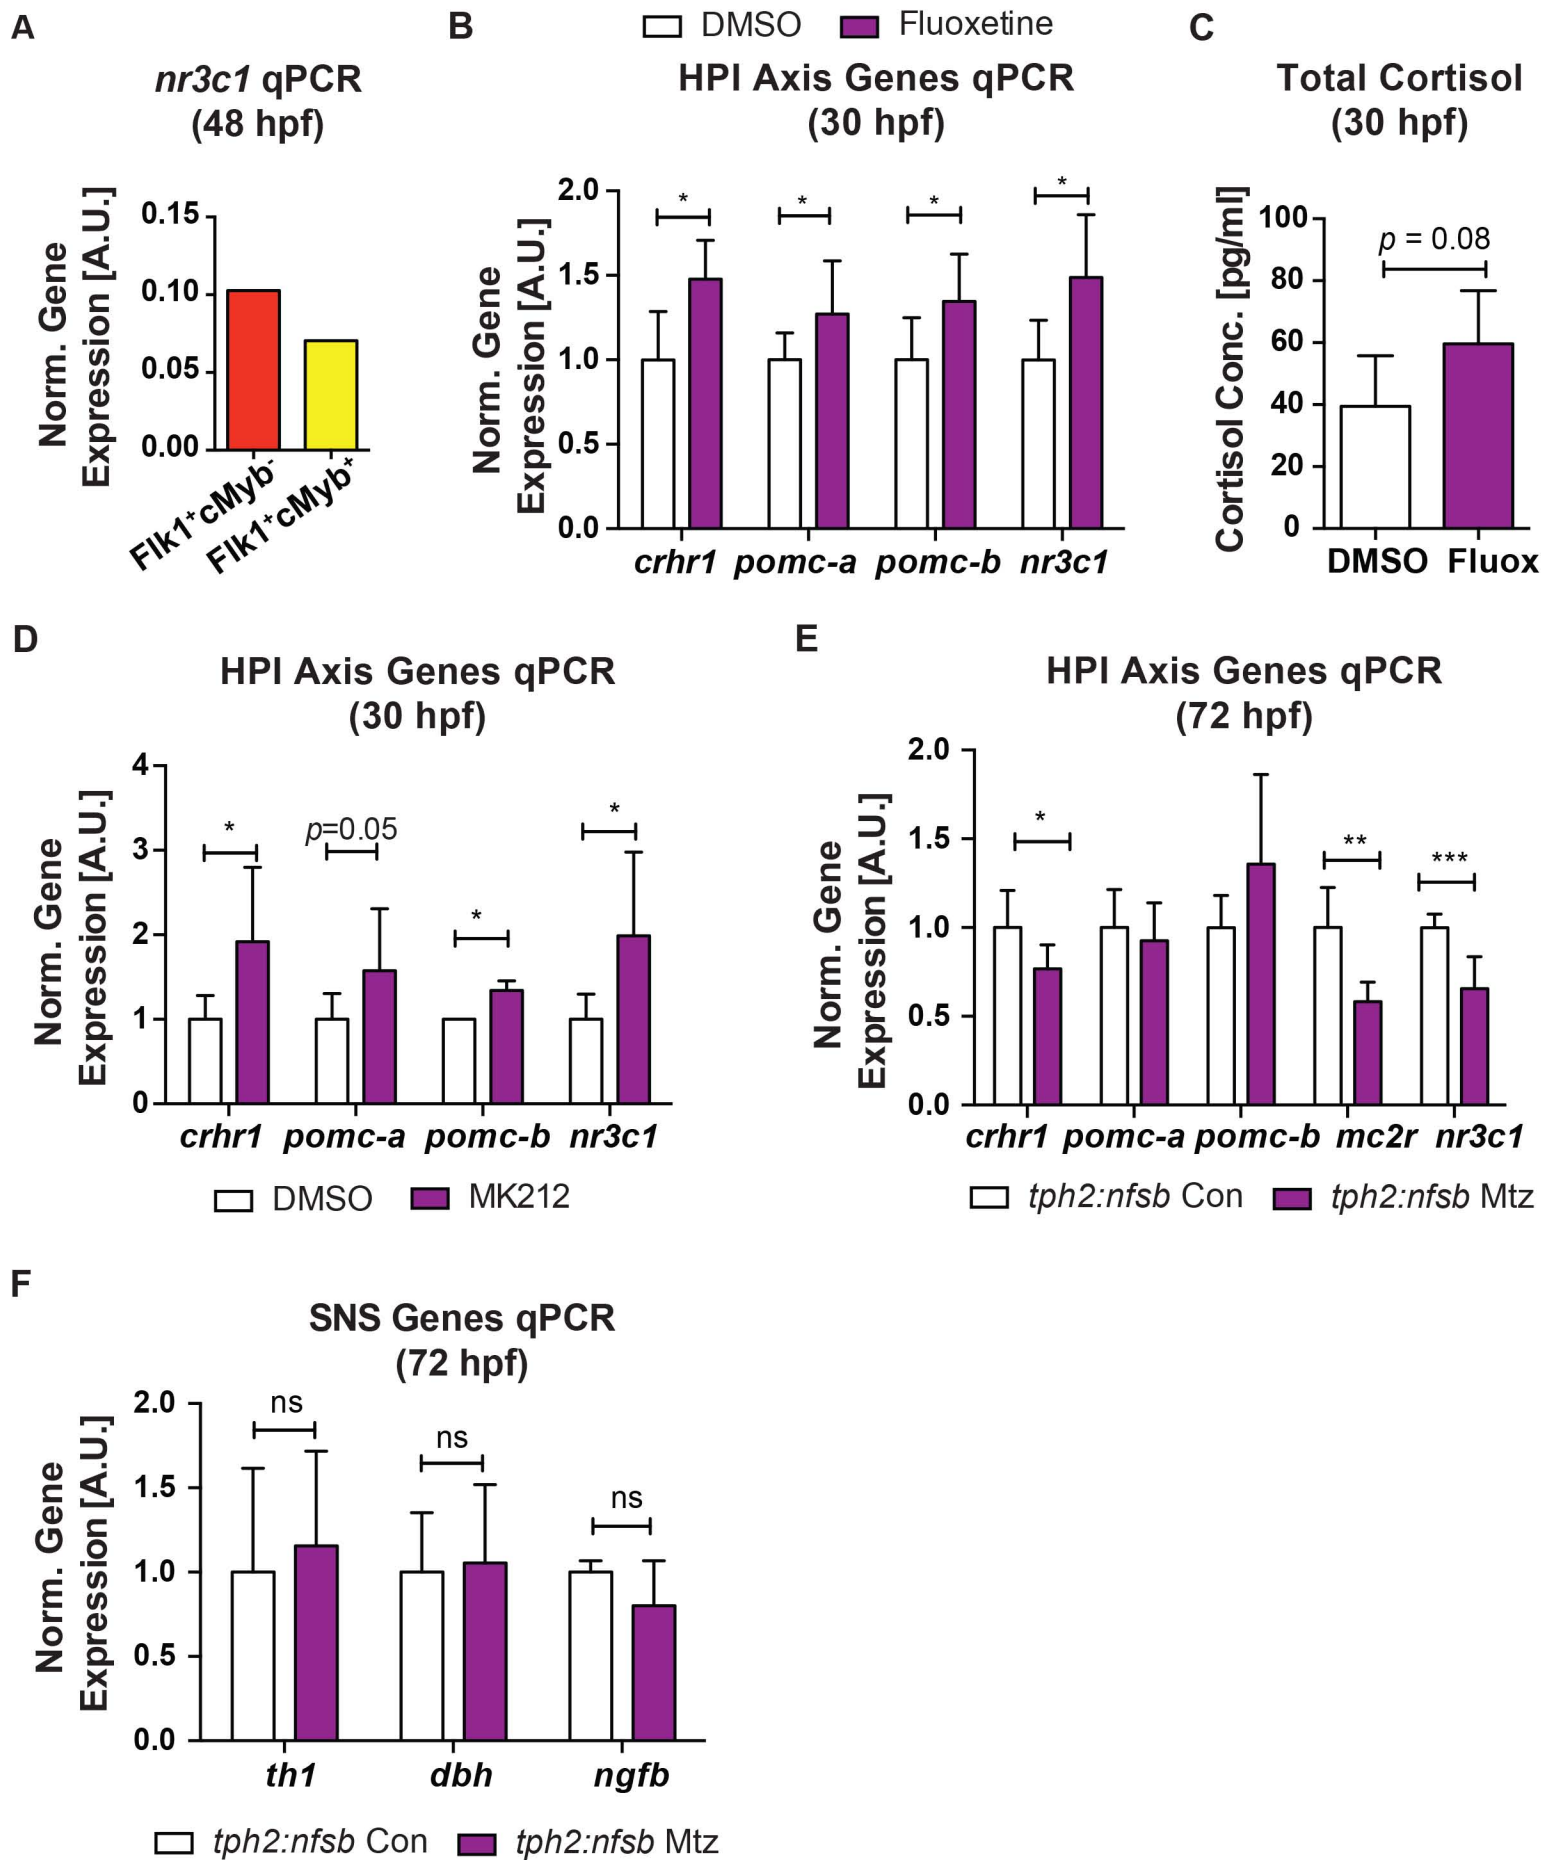

Figure S7. Related to Figure 6.

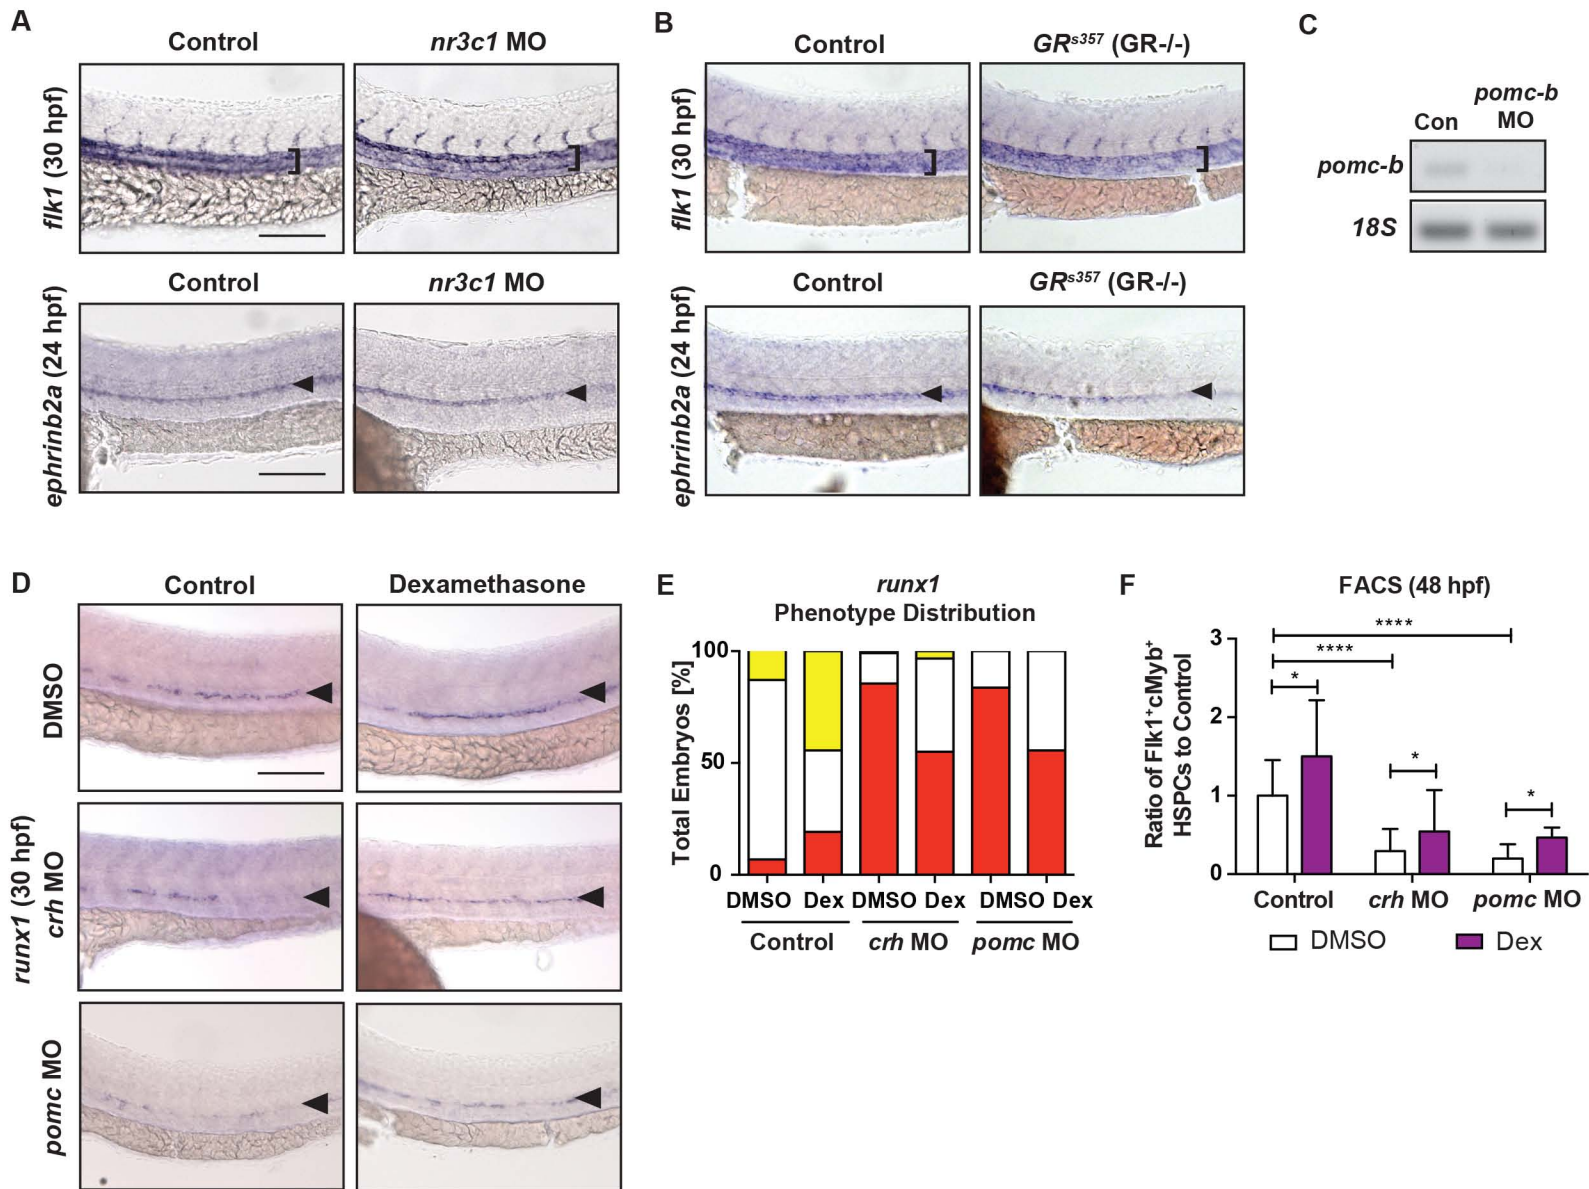

## Supplemental Figure Legends

**Figure S1. Related to Figure 1.** Serotonin and Fluoxetine Treated Embryos Have Normal Hematopoietic Niche Development, and 5-HTR Agonists Alter HSPC Formation.

- (A) *Tg(flk1:dsred;cmlyb:gfp)* embryos were disaggregated and FACS sorted into endothelial niche (Flk1:dsRed<sup>+</sup>cmlyb:GFP<sup>-</sup>) and HSPC (Flk1:dsRed<sup>+</sup>cmlyb:GFP<sup>+</sup>) populations at 48hpf, then used to evaluate relative expression of 5-HT receptors (*htr*) in comparison to whole embryos.
- (B) Exposure to serotonin receptor agonists demonstrated that stimulation of representative 5-HTRs expressed on HSPCs (5-HTR1F) and neural-associated (5-HTR2C) both impacted *runx1/cmlyb*<sup>+</sup> HSPCs by WISH at 30hpf (LY344864, 10 $\mu$ M; MK212, 7.5 $\mu$ M).
- (C) Qualitative phenotype distribution graph of (B) ( $\geq 20$  embryos per condition,  $\geq 3$  independent experiments). Up=yellow bar; Normal=white bar; Down=red bar.
- (D,E) WISH showing normal expression of *flk1* (30hpf) and *ephrinb2a* (24hpf) in serotonin- and fluoxetine-treated embryos ( $n \geq 20$ , no difference observed).

Scale bars=100 $\mu$ M.

**Figure S2. Related to Figure 2.** mRNA and Exogenous Serotonin Can Rescue the Reduction in HSPCs Caused by Morpholino Knockdown of *tryptophan hydroxylase 1* and *2*.

- (A) WISH showing normal expression of *flk1* (30hpf) and *ephrinb2a* (24hpf) in *para*-Chlorophenylalanine (*pCPA*)-treated embryos ( $n \geq 20$ , no difference observed).
- (B) Time-course analysis of whole embryo *tph1a*, *tph1b*, and *tph2* expression from 0 to 30hpf by qPCR.
- (C) WISH showing spatial-temporal expression of *tph1a*, *tph1b*, and *tph2* at 30hpf.
- (D) WISH indicating normal expression of *flk1* (30hpf) and *ephrinb2a* (24hpf) in *tph1a+b*, *tph2*, and *tph all* morphants ( $n \geq 20$ , no difference observed).
- (E) RT-PCR showing decreased gene expression following successful MO targeting in the respective morphants at 24hpf for *tph1a*, and 30hpf for *tph1b* and *tph2* (pool of 30 embryos/band).
- (F) Administration of *tph1a*, *tph1b*, and *tph2* mRNA restored *runx1/cmlyb* expression in each respective morphant at 30hpf.
- (G) Qualitative phenotype distribution graph of (F). Con=control; m=mRNA; MO=morphant; R=rescue.
- (H) Serotonin (7 $\mu$ M) exposure restored *runx1* expression in *tph* morphants at 30hpf.
- (I) Qualitative phenotype distribution graph of (I). D=DMSO; S=serotonin.

Scale bars=100 $\mu$ M.

**Figure S3. Related to Figure 2.** Sustained HSPC Effects Are Present in Embryos with *tph2*-Morpholino Knockdown and 5HT2C Antagonist Treatment.

- (A) WISH showing decreased *cmlyb* expression at 72hpf in the caudal hematopoietic tissue (CHT) in *tph2* and *tph all* (combined *tph1a*, *tph1b*, *tph2*) morphants but not for *tph1a*, *tph1b*, or *tph1a+b*.
- (B) Qualitative phenotype distribution graph of (A).
- (C) WISH showing decreased HSPC formation (*cmlyb*) is sustained in embryos treated with a 5-HTR2C antagonist (RS100121, 10 $\mu$ M), but not 5-HTR1A antagonist (WAY100131, 2.5 $\mu$ M) at 48hpf, despite negative effects on *runx1* expression for both compounds at 30hpf.

Scale bars=100 $\mu$ M.

**Figure S4. Related to Figure 3.** Selective Ablation of Serotonergic Neurons Decreases the Myeloid Lineage Population.

- (A) Representative images of *mipo*<sup>+</sup> myeloid cells in wildtype (WT) and *tph2:nfsb-mcherry* embryos at 5dpf after metronidazole (Mtz) treatment.
- (B) Expression of *mipo* by qPCR at 5dpf was significantly decreased in *tph2:nfsb-mcherry* embryos with metronidazole (Mtz) treatment, compared to controls ( $n \geq 5$  replicates of 30 embryos pooled; mean $\pm$ SD; two-way ANOVA, Holm-Sidak *post hoc*: \*\* $p < 0.01$ ).
- (C) Qualitative phenotype distribution of *tph2:nfsb-mcherry* embryos from (A).

Scale bar=100 $\mu$ M.



**Figure S5. Related to Figure 4.** Serotonin Exposure Increases HSPC Formation Despite Inhibition of the Sympathetic Nervous System by *tyrosine hydroxylase 1* Morpholino Knockdown.

- (A) Representative images of *cmyb*<sup>+</sup> HSPCs in the CHT of embryos treated with serotonin in the absence or presence of either 6-hydroxydopamine (6-OHDA, 200 $\mu$ M) or dopamine beta hydroxylase inhibitor nepicastat (30 $\mu$ M) at 72hpf.
  - (B) Qualitative phenotype distribution of (B).
  - (C) Representative images of *tyrosine hydroxylase (th1)* WISH demonstrating sympathetic ganglion inhibition (boxed) in *th1* morphants at 72hpf.
  - (D) Representative images of *cmyb*<sup>+</sup> HSPCs in the CHT of embryos treated with serotonin in the absence or presence of *th1*-MO knockdown at 72hpf.
  - (E) Qualitative phenotype distribution of (D).
- Scale bars=100 $\mu$ M.

**Figure S6. Related to Figure 5.** Endogenous Serotonin Activates the HPA/I axis.

- (A) FACS-sorted endothelial niche cells (Flk1:dsRed<sup>+</sup>cMyb:GFP<sup>+</sup>) and HSPCs (Flk1:dsRed<sup>+</sup>cMyb:GFP<sup>+</sup>) expressed *nr3c1* as evaluated by qPCR at 48hpf.
- (B) Fluoxetine (30 $\mu$ M) significantly increased expression of HPA/I axis genes at 30hpf by qPCR (n $\geq$ 4 replicates of 30 embryos pooled; mean $\pm$ SD; two-tailed *t*-test: \**p*<0.05).
- (C) Fluoxetine elevated whole embryo cortisol levels by ELISA assay at 30hpf (n $\geq$ 5 replicates of 30 embryos pooled; mean $\pm$ SD; *p*=0.08).
- (D) MK212 (7.5  $\mu$  M) significantly increased expression of HPA/I axis genes at 30hpf by qPCR (n $\geq$ 3 replicates of 30 embryos pooled; mean $\pm$ SD; two-tailed *t*-test: \**p*<0.05).
- (E,F) *tph2:nfsb-mcherry* embryos with metronidazole (Mtz, 10  $\mu$  M) treatment significantly decreased expression of HPA/I axis genes (E), but not SNS genes (F) at 72hpf by qPCR (n $\geq$ 6 replicates of 30 embryos pooled; mean $\pm$ SD; two-tailed *t*-test: \**p*<0.05, \*\**p*<0.01, \**p*<0.001).

**Figure S7. Related to Figure 6.** *nr3c1* Morphants and *GR* Mutants Have Normal Hemogenic Endothelium Development.

- (A,B) WISH showing normal expression of *flkl* (30 hpf) and *ephrinb2a* (24hpf) in *nr3c1* MO-injected (A) and *GR*<sup>s357</sup> embryos (B). (n $\geq$ 20, no difference observed).
- (C) RT-PCR showing decreased gene expression of *pomc-b* in *pomc-b* MO-injected embryos at 30hpf (pool of 30 embryos/band).
- (D) Dexamethasone (1 $\mu$ M) partially rescued HSPC defects seen in *crh* and *pomc* MO-injected embryos at 30hpf by *runx1* WISH.
- (E) Qualitative phenotype distribution of (E).
- (F) Dexamethasone (1 $\mu$ M) partially rescued Flk1:dsRed<sup>+</sup>cMyb:GFP<sup>+</sup> HSPCs in *crh* and *pomc* MO-injected embryos at 48hpf by FACS (n $\geq$ 5 replicates of 5 embryos pooled; mean $\pm$ SD; two-way ANOVA, Holm-Sidak *post hoc*: \**p*<0.05, \*\*\**p*<0.001).

Scale bars=100 $\mu$ M.

## Supplemental Experimental Procedures

### Transgenic and Mutant Zebrafish Lines (Refers to Zebrafish Husbandry)

| Official Line Name               | Common Name              | Reference                  |
|----------------------------------|--------------------------|----------------------------|
| <i>Tg(runx1P1:egfp)</i>          | <i>runx1:gfp</i>         | (Lam et al., 2010)         |
| <i>Tg(cmyb:egfp)</i>             | <i>cmyb:gfp</i>          | (North et al., 2010)       |
| <i>Tg(kdrl:dsred2)</i>           | <i>flkl:dsred</i>        | (Kikuchi et al., 2011)     |
| <i>Tg(tph2:nfsb-mcherry)y226</i> | <i>tph2:nfsb</i>         | (Yokogawa et al., 2012)    |
| <i>nr3c1<sup>s357</sup></i>      | <i>GR<sup>s357</sup></i> | (Ziv et al., 2013)         |
| <i>Tg(-6.0itga2b:egfp)</i>       | <i>cd41:gfp</i>          | (Bertrand et al., 2008)    |
| <i>Tg(phd3:gfp)</i>              | <i>phd3:gfp</i>          | (Santhakumar et al., 2012) |

### Morpholino Sequences (Refers to Morpholino, mRNA, and Plasmid Injections)

| Gene          | Morpholino                 | Type   | Reference                 |
|---------------|----------------------------|--------|---------------------------|
| <i>tph1a</i>  | CGACTCCTAAAAGTGCTTACTTCAT  | splice | unpublished               |
| <i>tph1b</i>  | ATGCTTGATAAAGCTCGTACCTCAT  | splice | unpublished               |
| <i>tph2</i>   | CAATGGGTTTCAGCACTACCCATGGA | splice | unpublished               |
| <i>nr3c1</i>  | CTCCAGTCCTCCTTGATCCATTTTG  | splice | (Nesan and Vijayan, 2013) |
| <i>crh</i>    | TGGTGACGAGAAAATTGAGCTTCAT  | splice | (Wagle et al., 2011)      |
| <i>pomc-a</i> | ACAACATCCTCACTCCCTCACCAT   | splice | (Wagle et al., 2011)      |
| <i>pomc-b</i> | CACTGCTGTGGAGTCAGGATAGAGA  | splice | unpublished               |
| <i>th1</i>    | CAGGTTAACAGACTTACATTTGACC  | splice | (Formella et al., 2012)   |

### mRNA Cloning (Refers to Morpholino, mRNA, and Plasmid Injections)

For mRNA rescue: *tph1a*, *tph1b* and *tph2* Coding Data Sequences were amplified by PCR (see primers below) from IMAGE clones 4789933, 6792324 and 36hpf cDNA, respectively, prior to cloning into pCS2+ (BamHI/EcoRI). After linearization with NotI, the CDS of *tph1a*, *tph1b* and *tph2* was transcribed using mMessage mMachine SP6 transcription kit (ThermoFisher Scientific), according to manufacturer's protocol. Rescue experiments were performed by co-injection of the respective targeting MO either with either 50ng/μL (*tph1b*) or 200ng/μL (*tph1a*, *tph2*) of the mRNA. For GR overexpression study: *nr3c1* was amplified from 36hpf cDNA using primers indicated below, and cloned into pME-MCS. pDest-*runx1-nr3c1* was generated using the Multigateway Tol2 system with p5E-*runx1*, pME-*nr3c1*, p3EpolyA, and pDesTol2AB2 as previously described (Kwan et al., 2007). pDest-*runx1-nr3c1* and Tol2-transposase mRNA were co-injected into one-cell stage embryos. For Hif1α loss: *dnhif1* mRNA was prepared as previously described (Elks et al., 2011).

| Gene         | Forward                   | Reverse                   |
|--------------|---------------------------|---------------------------|
| <i>tph1a</i> | ACCATGTACTCGAGTAAAAGCGACG | TCAGACTCCTAGTTGTTTGTTTAGC |
| <i>tph1b</i> | ACCATGCTCTCCAACAAGCTTGAC  | TCAGACACCGAGGTGTGTG       |
| <i>tph2</i>  | ACCATGTATGACCAACAGCACCTTG | GGGACTGTGTTTGTTTAGATACCG  |
| <i>nr3c1</i> | GCAAAATGGATCAAGGAGGA      | CTGCTGTTGGGAGGAGATTC      |

**qPCR Primers** (Refers to RNA Extraction and Quantitative Reverse Transcriptase Polymerase Chain Reaction)

| <b>Gene</b>      | <b>Forward</b>          | <b>Reverse</b>            |
|------------------|-------------------------|---------------------------|
| <i>l8s</i>       | TCGCTAGTTGGCATCGTTTAT   | CGGAGGTTCGAAGACGATCA      |
| <i>runx1</i>     | CGTCTTCACAAACCCCTCCTCAA | GCTTTACTGCTTCATCCGGCT     |
| <i>cmyb</i>      | TGATGCTTCCCAACACAGA     | TTCAGAGGGAATCGTCTGCT      |
| <i>tph1a</i>     | TGACTTGCAAACAGGAGTGC    | CACTCTGCGTGTACGGGTTA      |
| <i>tph1b</i>     | TGCTAAAATCCTGCCCTTTG    | GAGAATGGACGCTGGATTGT      |
| <i>tph2</i>      | GAGACTTCCTGGCTGGACTG    | ACTGAGCAAATTTGGGATCG      |
| <i>rag2</i>      | ACGCTCATGTCCAACCTGGGATA | CTCTGCTGTCTACGCTCAACATGTA |
| <i>mpo</i>       | TGATGTTTGGTTAGGAGGTG    | GAGCTGTTTTCTGTTTGGTG      |
| <i>th1</i>       | GCTCTAAAAGCCCTGCGCT     | TTTGGTGACAAGATGATGGCA     |
| <i>dbh</i>       | TTGGTGATTCTGTGGGATGA    | CAACGATAGGATGGGATGCT      |
| <i>ngfb</i>      | GCCCCGCCATTGGAACCTC     | TGAAGTCAGCGCACGTACAAA     |
| <i>crhr1</i>     | CTTGGGGTCCGATACAACAC    | AGTGGCCCAGGTAGTTGATG      |
| <i>pome-a</i>    | AGGTCGACTATCCGCAAGAA    | TCCTCGGTTGGTCTTTATGC      |
| <i>pome-b</i>    | TGTGTTTTACAGCCACAT      | GCAAACCAAGCTCAGACTC       |
| <i>nr3c1</i>     | AGACCTTGGTCCCCTTCACT    | CCCAATGTGTCCAAAGGAAT      |
| <i>htr1aa</i>    | GACCTTATGGTGTGCGGTGCT   | GTCTATGGGATCGGTGATGG      |
| <i>htr1ab</i>    | ACATTAAAACGCGCTGCTCT    | TGATAAATGCGCAAAAGGTG      |
| <i>htr1b</i>     | GGTCTCTGGGCAGTGACAAT    | GACGAACAGAGGGGAATCAA      |
| <i>htr1bd</i>    | TTGAAGACTCGCTCGTGATG    | GATGGCTGGTTTTGCAGTTT      |
| <i>htr1e</i>     | ACGTGGGCTACACCATCTTC    | GACACAGAAGGCATGCTTGA      |
| <i>htr1fa</i>    | AGATCTACCGAGCAGCGAAG    | ATTCGAGATGCGATGTCTCC      |
| <i>htr1fb</i>    | CCATGTGGCTTTTACCGTCT    | AGACTTCTCGATTGGGCAGA      |
| <i>htr2a</i>     | GTCACTTGCGGTTGCAGATA    | ATTGCACACAGGTGCATGAT      |
| <i>htr2cl1</i>   | ACAGACCCCTCCGAATC       | CTCCAGCAGGCAGGAATG        |
| <i>htr3a</i>     | TGGGATCCTGAGGAATTTGA    | GGCAGTCACTACTTGGATAGGC    |
| <i>htr3a 201</i> | TGGGATCCTGAGGAATTTGA    | GGCTTATAGTTGCTGACAAGTCC   |
| <i>htr3b</i>     | TGTGGACGGACAGACTCAAA    | TTGCCAACATCAACAAATTCA     |
| <i>htr4</i>      | TGCTCAACCCCATCCTCTAC    | GGAGCAGCCGTTTCACTACAT     |
| <i>htr5</i>      | TTCCAAATGCTGTTGCAGTC    | ACGCTGAACACTGTCTGTGG      |
| <i>htr6</i>      | TCCGCTGTCGGTGAACAG      | TGGTACACACTCGCACACC       |
| <i>htr7 1</i>    | TGGAGAGGTCTTCTGCAACA    | TTCCAAGGTATCTATCCACACTGA  |
| <i>mc2r</i>      | CTCCGTTCTCCCTTCATCTG    | ATTGCCGGATCAATAACAGC      |

## Supplemental References

- Bertrand, J.Y., Kim, A.D., Teng, S., and Traver, D. (2008). CD41<sup>+</sup> cmyb<sup>+</sup> precursors colonize the zebrafish pronephros by a novel migration route to initiate adult hematopoiesis. *Development* *135*, 1853-1862.
- Elks, P.M., van Eeden, F.J., Dixon, G., Wang, X., Reyes-Aldasoro, C.C., Ingham, P.W., Whyte, M.K., Walmsley, S.R., and Renshaw, S.A. (2011). Activation of hypoxia-inducible factor-1alpha (Hif-1alpha) delays inflammation resolution by reducing neutrophil apoptosis and reverse migration in a zebrafish inflammation model. *Blood* *118*, 712-722.
- Formella, I., Scott, E.K., Burne, T.H., Harms, L.R., Liu, P.Y., Turner, K.M., Cui, X., and Eyles, D.W. (2012). Transient knockdown of tyrosine hydroxylase during development has persistent effects on behaviour in adult zebrafish (*Danio rerio*). *PloS one* *7*, e42482.
- Kikuchi, K., Holdway, J.E., Major, R.J., Blum, N., Dahn, R.D., Begemann, G., and Poss, K.D. (2011). Retinoic acid production by endocardium and epicardium is an injury response essential for zebrafish heart regeneration. *Developmental cell* *20*, 397-404.
- Kwan, K.M., Fujimoto, E., Grabher, C., Mangum, B.D., Hardy, M.E., Campbell, D.S., Parant, J.M., Yost, H.J., Kanki, J.P., and Chien, C.B. (2007). The Tol2kit: a multisite gateway-based construction kit for Tol2 transposon transgenesis constructs. *Developmental dynamics : an official publication of the American Association of Anatomists* *236*, 3088-3099.
- Lam, E.Y., Hall, C.J., Crosier, P.S., Crosier, K.E., and Flores, M.V. (2010). Live imaging of Runx1 expression in the dorsal aorta tracks the emergence of blood progenitors from endothelial cells. *Blood* *116*, 909-914.
- Nesan, D., and Vijayan, M.M. (2013). The transcriptomics of glucocorticoid receptor signaling in developing zebrafish. *PloS one* *8*, e80726.
- Wagle, M., Mathur, P., and Guo, S. (2011). Corticotropin-releasing factor critical for zebrafish camouflage behavior is regulated by light and sensitive to ethanol. *J Neurosci* *31*, 214-224.
